# Supplementary material for: Serological prevalence of SARS-CoV-2 infection and associated factors in healthcare workers in a “non-COVID” hospital in Mexico City
Source: PLOS journal article supplement (doi:10.1371/journal.pone.0255916), 2021-08-12
Supplement: S5 (10.1371/journal.pone.0255916.s005) [file journal.pone.0255916.s005]

S4 Table. Logistic regression model adjusted by confounding variable: contact with patients at work (high contact).

| Logistic regression model between associated variables and result odds from ELISA tests. <sup>a</sup>                                                                |             |        |        |        |
|----------------------------------------------------------------------------------------------------------------------------------------------------------------------|-------------|--------|--------|--------|
| Variable                                                                                                                                                             | Adjusted OR | 95% CI |        | P      |
|                                                                                                                                                                      |             | Lower  | Upper  |        |
| Sex (male)                                                                                                                                                           | 0.31        | 0.11   | 0.90   | 0.031  |
| Olfactory alterations                                                                                                                                                | 35.13       | 11.54  | 106.92 | <0.001 |
| Work group strata                                                                                                                                                    |             |        |        |        |
| Administrative                                                                                                                                                       | Ref.        | -      | -      | -      |
| Scientific research                                                                                                                                                  | 1.24        | 0.13   | 12.03  | 0.849  |
| Medical personnel                                                                                                                                                    | 0.35        | 0.06   | 1.92   | 0.226  |
| Nursing                                                                                                                                                              | 0.81        | 0.19   | 3.49   | 0.775  |
| Stretcher-bearers and orderlies                                                                                                                                      | 0.75        | 0.07   | 8.38   | 0.819  |
| Technicians and lab personnel                                                                                                                                        | 0.76        | 0.10   | 5.83   | 0.791  |
| Therapists and patient counseling                                                                                                                                    | 1.98        | 0.50   | 7.88   | 0.332  |
| Janitorial                                                                                                                                                           | 13.51       | 2.82   | 64.77  | 0.001  |
| Security                                                                                                                                                             | 12.49       | 1.34   | 116.63 | 0.027  |
| Food services                                                                                                                                                        | 5.21        | 0.43   | 63.23  | 0.195  |
| Contact with patients at work (high contact)                                                                                                                         | 0.79        | 0.29   | 2.17   | 0.653  |
| <b>Pseudo R<sup>2</sup> = 0.32</b>                                                                                                                                   |             |        |        |        |
| <sup>a</sup> Model adjusted by sex, olfactory alterations, work group strata and one potentially confounding variable: contact with patients at work (high contact). |             |        |        |        |
